# Supplementary material for: Thermal Gelation for Synthesis of Surface-Modified Silica Aerogel Powders
Source: MDPI journal article supplement (doi:10.3390/gels7040242), 2021-11-29
Supplement: s1 [file s1]

## Supplementary materials

# Thermal Gelation for Synthesis of Surface-Modified Silica Aerogel Powders

Kyoung-Jin Lee, Jae Min Lee, Ki Sun Nam and Haejin Hwang \*

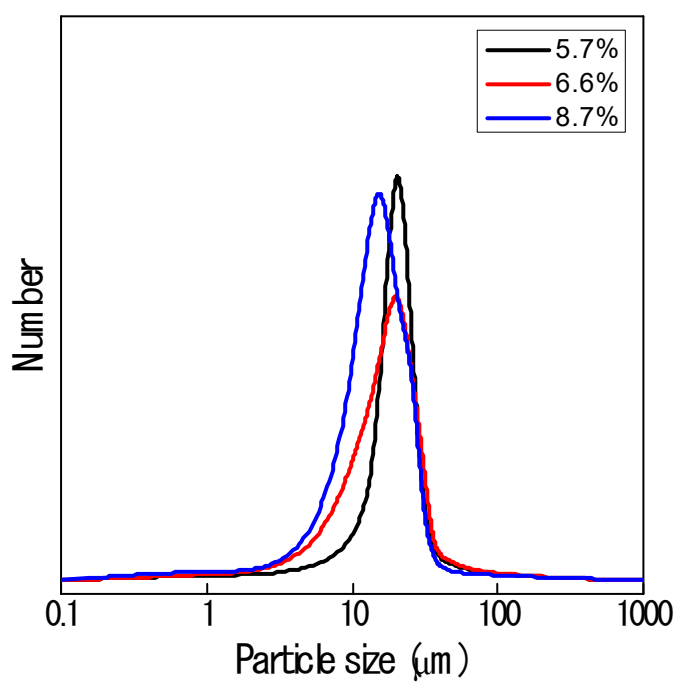

**Figure S1.** Particle size distributions of silica aerogel powder samples prepared with different water glass concentrations.
